# Supplementary material
Source: publisher figshare collection journal article supplement (https://tandf.figshare.com/articles/dataset/_/9883070)
Supplement: Supplementary file 1 [file 2]

Archive with 2 entries (2 files):
- code.zip
- unblinded -- Supplementary material.pdf
